# Supplementary material
Source: publisher figshare collection journal article supplement (https://tandf.figshare.com/ndownloader/files/17430611)
Supplement: Supplementary file 1 [file 17430611]

**Table S1 -** Basic information of stream conductivity and major ions concentrations of the Taizi River catchment.

| Parameter | Mean (Standard deviation) | Minimum | Maximum |
| --- | --- | --- | --- |
| Conductivity (μS cm-1) | 356.67 (212.28) | 67 | 1133 |
| Potassium (mg l-1) | 3.18 (2.47) | 0.14 | 15.6 |
| Calcium (mg l-1) | 36.26 (19.51) | 0.06 | 92 |
| Sodium (mg l-1) | 10.54 (11.62) | 0.05 | 76.15 |
| Magnesium (mg l-1) | 8.51 (6.85) | 0.08 | 38.75 |
| Chloride (mg l-1) | 22.87 (25.24) | 4.64 | 163 |
| Sulfate (mg l-1) | 68.91 (48.84) | 12.1 | 304.5 |
| Bicarbonate (mg l-1) | 43.1 (23.28) | 1.69 | 116.5 |
| Carbonate (mg l-1) | 0.36 (1.15) | 0 | 6.8 |
